# Supplementary material
Source: PubMed Central journal article supplement (PMC5512695)
Supplement: NIHMS874290-supplement-SI.pdf [file NIHMS874290-supplement-SI.pdf]

## **Supporting Information**

### **Discrimination of Native-like States of Membrane Proteins with Implicit Membrane-Based Scoring Functions**

Bercem Dutagaci<sup>1</sup>, Kitiyaporn Wittayanarakul<sup>2</sup>, Takaharu Mori<sup>3</sup>, Michael Feig<sup>1</sup>

<sup>1</sup>Department of Biochemistry and Molecular Biology, Michigan State University, East Lansing, MI, USA, <sup>2</sup>Department of Natural Resource and Environmental Management, Faculty of Applied Science and Engineering, Khon Kaen University, Nong Khai Campus, Nong Khai 43000, Thailand, <sup>3</sup>Theoretical Molecular Science Laboratory, RIKEN, Wako-shi, Japan

**Tables S1-S8**

**Table S1.** Z-scores for each protein in decoy set 1 with different scoring functions with different membrane widths after application of the full scoring protocol.

| Model    | Membrane width [Å] | BRD7 | fmr5 | ltpA | RHOD | VATP |
|----------|--------------------|------|------|------|------|------|
| IMM1     | 23.1               | 4.19 | 2.65 | 2.34 | 3.89 | 2.46 |
|          | 25.4               | 4.36 | 2.73 | 2.02 | 3.80 | 2.54 |
|          | 27.0               | 4.10 | 2.48 | 2.74 | 3.26 | 2.62 |
|          | 28.5               | 4.25 | 2.63 | 2.54 | 3.01 | 2.40 |
|          | 30.4               | 4.10 | 2.82 | 2.18 | 2.50 | 2.12 |
| IMM1-p36 | 23.1               | 4.39 | 4.72 | 2.28 | 4.33 | 3.12 |
|          | 25.4               | 4.45 | 4.61 | 2.71 | 3.60 | 3.26 |
|          | 27.0               | 4.22 | 4.22 | 2.55 | 3.84 | 3.33 |
|          | 28.5               | 4.32 | 4.31 | 2.35 | 4.33 | 3.40 |
|          | 30.4               | 4.50 | 4.87 | 2.07 | 3.75 | 3.44 |
| GBSW     | 23.1               | 6.41 | 2.94 | 2.10 | 4.44 | 3.00 |
|          | 25.4               | 5.61 | 2.75 | 2.14 | 4.37 | 3.31 |
|          | 27.0               | 6.41 | 2.77 | 1.92 | 4.70 | 3.72 |
|          | 28.5               | 5.45 | 3.17 | 2.07 | 4.82 | 3.73 |
|          | 30.4               | 5.88 | 2.97 | 2.64 | 5.00 | 3.82 |
| HDGBv2   | 23.1               | 6.51 | 3.73 | 2.35 | 5.07 | 3.65 |
|          | 25.4               | 6.00 | 4.43 | 2.29 | 5.17 | 3.62 |
|          | 27.0               | 5.98 | 3.75 | 2.69 | 5.31 | 4.02 |
|          | 28.5               | 5.97 | 4.34 | 2.11 | 4.87 | 3.79 |
|          | 30.4               | 5.99 | 4.30 | 2.37 | 4.79 | 3.66 |
| HDGBv3   | 23.1               | 5.76 | 3.76 | 3.57 | 4.44 | 3.24 |
|          | 25.4               | 6.04 | 3.90 | 2.47 | 4.67 | 3.67 |
|          | 27.0               | 5.67 | 4.19 | 2.69 | 5.50 | 3.40 |
|          | 28.5               | 5.69 | 4.27 | 2.44 | 5.41 | 3.53 |
|          | 30.4               | 5.84 | 3.89 | 2.58 | 4.89 | 4.09 |
| HDGBvdW  | 23.1               | 5.81 | 4.17 | 2.33 | 4.53 | 2.95 |
|          | 25.4               | 5.77 | 4.27 | 1.99 | 4.94 | 2.93 |
|          | 27.0               | 5.74 | 4.34 | 2.42 | 5.67 | 3.36 |
|          | 28.5               | 5.29 | 4.57 | 2.18 | 5.04 | 3.09 |
|          | 30.4               | 5.42 | 4.67 | 1.94 | 5.35 | 3.30 |

**Table S2.** Spearman's rank correlation coefficients between scores and RMSD<sub>1</sub> and RMSD<sub>2</sub> for each protein in decoy set 1 with different scoring functions with different membrane widths after application of the full scoring protocol.

| Model    | Membrane width [Å] | RMSD <sub>1</sub> |      |      |       |      | RMSD <sub>2</sub> |      |      |      |      |
|----------|--------------------|-------------------|------|------|-------|------|-------------------|------|------|------|------|
|          |                    | BRD7              | fmr5 | ltpA | RHOD  | VATP | BRD7              | fmr5 | ltpA | RHOD | VATP |
| IMM1     | 23.1               | 0.26              | 0.28 | 0.10 | 0.32  | 0.47 | 0.31              | 0.30 | 0.28 | 0.41 | 0.42 |
|          | 25.4               | 0.22              | 0.21 | 0.16 | 0.21  | 0.54 | 0.29              | 0.21 | 0.44 | 0.31 | 0.50 |
|          | 27.0               | 0.26              | 0.24 | 0.14 | 0.24  | 0.50 | 0.34              | 0.24 | 0.40 | 0.34 | 0.47 |
|          | 28.5               | 0.27              | 0.25 | 0.14 | 0.22  | 0.54 | 0.38              | 0.27 | 0.37 | 0.33 | 0.53 |
|          | 30.4               | 0.30              | 0.21 | 0.18 | 0.15  | 0.45 | 0.42              | 0.25 | 0.40 | 0.24 | 0.46 |
| IMM1-p36 | 23.1               | 0.23              | 0.32 | 0.11 | 0.10  | 0.49 | 0.29              | 0.34 | 0.31 | 0.21 | 0.47 |
|          | 25.4               | 0.25              | 0.27 | 0.18 | 0.16  | 0.50 | 0.33              | 0.26 | 0.49 | 0.27 | 0.49 |
|          | 27.0               | 0.25              | 0.32 | 0.16 | 0.19  | 0.62 | 0.32              | 0.33 | 0.52 | 0.29 | 0.59 |
|          | 28.5               | 0.24              | 0.29 | 0.18 | 0.15  | 0.57 | 0.37              | 0.31 | 0.50 | 0.24 | 0.57 |
|          | 30.4               | 0.29              | 0.30 | 0.19 | 0.18  | 0.51 | 0.42              | 0.32 | 0.48 | 0.27 | 0.55 |
| GBSW     | 23.1               | 0.33              | 0.36 | 0.16 | 0.03  | 0.64 | 0.42              | 0.38 | 0.47 | 0.15 | 0.70 |
|          | 25.4               | 0.24              | 0.37 | 0.15 | 0.05  | 0.61 | 0.31              | 0.38 | 0.45 | 0.14 | 0.68 |
|          | 27.0               | 0.19              | 0.32 | 0.12 | 0.01  | 0.54 | 0.27              | 0.33 | 0.42 | 0.10 | 0.59 |
|          | 28.5               | 0.21              | 0.37 | 0.15 | 0.03  | 0.54 | 0.28              | 0.38 | 0.43 | 0.13 | 0.60 |
|          | 30.4               | 0.19              | 0.32 | 0.12 | 0.03  | 0.58 | 0.27              | 0.32 | 0.36 | 0.13 | 0.62 |
| HDGBv2   | 23.1               | 0.24              | 0.27 | 0.14 | 0.06  | 0.60 | 0.30              | 0.27 | 0.34 | 0.17 | 0.65 |
|          | 25.4               | 0.29              | 0.29 | 0.10 | 0.06  | 0.53 | 0.34              | 0.30 | 0.29 | 0.15 | 0.60 |
|          | 27.0               | 0.26              | 0.29 | 0.12 | -0.01 | 0.51 | 0.31              | 0.29 | 0.32 | 0.07 | 0.58 |
|          | 28.5               | 0.27              | 0.25 | 0.12 | -0.01 | 0.52 | 0.32              | 0.25 | 0.32 | 0.09 | 0.58 |
|          | 30.4               | 0.28              | 0.26 | 0.13 | 0.03  | 0.51 | 0.33              | 0.26 | 0.31 | 0.12 | 0.57 |
| HDGBv3   | 23.1               | 0.25              | 0.23 | 0.14 | 0.00  | 0.61 | 0.32              | 0.25 | 0.39 | 0.09 | 0.67 |
|          | 25.4               | 0.31              | 0.26 | 0.19 | -0.01 | 0.61 | 0.36              | 0.28 | 0.42 | 0.08 | 0.67 |
|          | 27.0               | 0.21              | 0.33 | 0.12 | 0.07  | 0.58 | 0.25              | 0.34 | 0.34 | 0.15 | 0.63 |
|          | 28.5               | 0.25              | 0.24 | 0.14 | 0.01  | 0.52 | 0.33              | 0.24 | 0.37 | 0.08 | 0.57 |
|          | 30.4               | 0.25              | 0.31 | 0.14 | 0.05  | 0.47 | 0.31              | 0.33 | 0.35 | 0.13 | 0.53 |
| HDGBvdW  | 23.1               | 0.14              | 0.11 | 0.04 | 0.03  | 0.50 | 0.19              | 0.14 | 0.30 | 0.11 | 0.55 |
|          | 25.4               | 0.16              | 0.17 | 0.03 | 0.01  | 0.47 | 0.22              | 0.18 | 0.29 | 0.08 | 0.53 |
|          | 27.0               | 0.16              | 0.19 | 0.06 | -0.06 | 0.48 | 0.20              | 0.21 | 0.29 | 0.01 | 0.54 |
|          | 28.5               | 0.19              | 0.21 | 0.04 | -0.08 | 0.41 | 0.22              | 0.23 | 0.29 | 0.00 | 0.48 |
|          | 30.4               | 0.14              | 0.20 | 0.02 | 0.10  | 0.36 | 0.18              | 0.21 | 0.22 | 0.15 | 0.43 |

**Table S3.** Average z-scores and Spearman’s rank correlation coefficients with different membrane widths for different energy components: total energy (TOT), van der Waals (VDW) energy, electrostatic (ELEC) energy, and electrostatic solvation (GB) energy for decoys in set 1. ASP denotes the cavity and electrostatic terms for IMM1 and IMM1-p36, the cavity term for GBSW, HDGBv2 and HDGBv3, and the cavity and van der Waals terms for HDGBvdW.

| Model    | Membrane width [Å] | Z-scores |      |      |       |       | Correlation coefficients |      |       |       |      |
|----------|--------------------|----------|------|------|-------|-------|--------------------------|------|-------|-------|------|
|          |                    | TOT      | VDW  | ELEC | ASP   | GB    | TOT                      | VDW  | ELEC  | ASP   | GB   |
| IMM1     | 23.1               | 3.11     | 2.41 | 1.51 | -0.59 | -     | 0.28                     | 0.24 | 0.11  | -0.02 | -    |
|          | 25.4               | 3.09     | 2.16 | 1.47 | -0.37 | -     | 0.27                     | 0.23 | 0.11  | -0.05 | -    |
|          | 27.0               | 3.04     | 2.27 | 1.52 | -0.48 | -     | 0.27                     | 0.24 | 0.12  | -0.03 | -    |
|          | 28.5               | 2.97     | 2.04 | 1.77 | -0.63 | -     | 0.28                     | 0.24 | 0.13  | -0.02 | -    |
|          | 30.4               | 2.74     | 1.94 | 1.59 | -0.42 | -     | 0.26                     | 0.24 | 0.15  | -0.04 | -    |
| IMM1-p36 | 23.1               | 3.77     | 2.58 | 2.17 | -0.64 | -     | 0.25                     | 0.24 | 0.08  | 0.02  | -    |
|          | 25.4               | 3.73     | 2.49 | 2.14 | -0.50 | -     | 0.27                     | 0.23 | 0.15  | -0.00 | -    |
|          | 27.0               | 3.63     | 2.40 | 2.17 | -0.48 | -     | 0.31                     | 0.22 | 0.17  | -0.01 | -    |
|          | 28.5               | 3.74     | 2.43 | 2.19 | -0.44 | -     | 0.29                     | 0.21 | 0.18  | -0.03 | -    |
|          | 30.4               | 3.72     | 2.70 | 2.12 | -0.52 | -     | 0.30                     | 0.22 | 0.19  | -0.00 | -    |
| GBSW     | 23.1               | 3.77     | 2.41 | 1.91 | 1.39  | -1.42 | 0.30                     | 0.31 | -0.05 | 0.16  | 0.07 |
|          | 25.4               | 3.64     | 2.51 | 1.59 | 1.28  | -1.05 | 0.28                     | 0.32 | -0.05 | 0.14  | 0.07 |
|          | 27.0               | 3.90     | 2.43 | 1.72 | 1.24  | -1.13 | 0.24                     | 0.32 | -0.06 | 0.15  | 0.07 |
|          | 28.5               | 3.85     | 2.33 | 1.49 | 1.13  | -0.86 | 0.26                     | 0.30 | -0.09 | 0.14  | 0.12 |
|          | 30.4               | 4.06     | 2.36 | 1.85 | 1.15  | -1.18 | 0.25                     | 0.32 | -0.09 | 0.13  | 0.11 |
| HDGBv2   | 23.1               | 4.26     | 2.53 | 1.45 | 1.24  | -0.91 | 0.26                     | 0.30 | -0.02 | 0.30  | 0.02 |
|          | 25.4               | 4.30     | 2.51 | 1.36 | 1.20  | -0.83 | 0.25                     | 0.28 | -0.04 | 0.29  | 0.04 |
|          | 27.0               | 4.35     | 2.53 | 1.37 | 1.25  | -0.79 | 0.23                     | 0.31 | -0.01 | 0.30  | 0.01 |
|          | 28.5               | 4.22     | 2.45 | 1.53 | 1.33  | -0.98 | 0.23                     | 0.31 | -0.05 | 0.27  | 0.06 |
|          | 30.4               | 4.22     | 2.63 | 1.20 | 1.17  | -0.66 | 0.24                     | 0.29 | -0.07 | 0.27  | 0.08 |
| HDGBv3   | 23.1               | 4.15     | 2.55 | 1.31 | 1.08  | -0.75 | 0.25                     | 0.28 | -0.02 | 0.31  | 0.03 |
|          | 25.4               | 4.15     | 2.34 | 1.55 | 1.28  | -0.86 | 0.27                     | 0.30 | -0.01 | 0.29  | 0.02 |
|          | 27.0               | 4.29     | 2.42 | 1.38 | 1.22  | -0.70 | 0.26                     | 0.32 | -0.04 | 0.27  | 0.05 |
|          | 28.5               | 4.27     | 2.37 | 1.51 | 1.26  | -0.82 | 0.23                     | 0.30 | -0.03 | 0.28  | 0.04 |
|          | 30.4               | 4.26     | 2.27 | 1.32 | 1.08  | -0.59 | 0.25                     | 0.30 | -0.04 | 0.28  | 0.05 |
| HDGBvdW  | 23.1               | 3.96     | 2.46 | 1.74 | -2.06 | -1.07 | 0.16                     | 0.29 | -0.05 | -0.17 | 0.06 |
|          | 25.4               | 3.98     | 2.68 | 1.29 | -2.10 | -0.69 | 0.17                     | 0.28 | -0.00 | -0.16 | 0.01 |
|          | 27.0               | 4.31     | 2.37 | 1.63 | -2.16 | -0.92 | 0.17                     | 0.29 | -0.04 | -0.20 | 0.05 |
|          | 28.5               | 4.03     | 2.60 | 1.25 | -1.94 | -0.61 | 0.15                     | 0.29 | -0.05 | -0.18 | 0.06 |
|          | 30.4               | 4.14     | 2.51 | 1.36 | -1.96 | -0.68 | 0.16                     | 0.29 | -0.01 | -0.18 | 0.03 |

**Table S4.** RMSD<sub>2</sub> values in [Å] for top-scoring models of each protein in decoy set 1 with different scoring functions with different membrane widths after application of the full scoring protocol.

| Model    | Membrane width [Å] | Top-1 |       |       |       |      | Top-10 |       |       |       |      |
|----------|--------------------|-------|-------|-------|-------|------|--------|-------|-------|-------|------|
|          |                    | BRD7  | fmr5  | ltpA  | RHOD  | VATP | BRD7   | fmr5  | ltpA  | RHOD  | VATP |
| IMM1     | 23.1               | 14.88 | 11.07 | 9.21  | 10.59 | 5.10 | 12.81  | 14.16 | 13.19 | 14.61 | 7.45 |
|          | 25.4               | 14.77 | 11.01 | 15.30 | 10.52 | 4.79 | 13.43  | 14.39 | 13.64 | 15.08 | 6.18 |
|          | 27.0               | 14.62 | 14.64 | 13.77 | 10.52 | 5.17 | 12.69  | 13.86 | 13.58 | 15.08 | 6.53 |
|          | 28.5               | 14.66 | 14.41 | 9.50  | 10.61 | 7.47 | 12.96  | 13.37 | 13.53 | 14.56 | 6.67 |
|          | 30.4               | 12.79 | 14.49 | 12.39 | 11.03 | 4.66 | 13.27  | 13.13 | 13.60 | 15.03 | 6.61 |
| IMM1-p36 | 23.1               | 12.90 | 12.42 | 15.16 | 10.64 | 5.08 | 13.39  | 13.19 | 12.94 | 15.21 | 6.39 |
|          | 25.4               | 12.76 | 10.50 | 13.79 | 10.57 | 4.83 | 13.46  | 13.76 | 13.94 | 14.79 | 6.05 |
|          | 27.0               | 12.94 | 14.60 | 15.16 | 10.56 | 5.11 | 12.38  | 13.95 | 13.04 | 14.99 | 6.25 |
|          | 28.5               | 14.71 | 14.54 | 13.85 | 10.63 | 5.41 | 12.94  | 12.86 | 14.33 | 14.96 | 6.37 |
|          | 30.4               | 12.89 | 14.62 | 14.03 | 11.08 | 4.64 | 12.40  | 13.27 | 13.74 | 15.61 | 6.09 |
| GBSW     | 23.1               | 14.67 | 14.66 | 13.67 | 17.57 | 5.39 | 12.01  | 14.17 | 13.12 | 15.00 | 6.63 |
|          | 25.4               | 14.65 | 14.62 | 11.98 | 17.57 | 7.47 | 12.11  | 13.56 | 13.21 | 15.01 | 6.18 |
|          | 27.0               | 11.65 | 14.63 | 11.95 | 17.59 | 5.35 | 12.31  | 13.56 | 13.55 | 15.32 | 6.33 |
|          | 28.5               | 12.88 | 14.68 | 12.01 | 17.61 | 7.51 | 12.29  | 13.71 | 13.15 | 15.33 | 5.98 |
|          | 30.4               | 11.74 | 14.68 | 11.94 | 17.58 | 7.50 | 11.81  | 13.36 | 13.39 | 15.23 | 5.74 |
| HDGBv2   | 23.1               | 10.39 | 14.67 | 13.65 | 10.61 | 7.44 | 11.98  | 13.73 | 13.86 | 15.04 | 5.81 |
|          | 25.4               | 13.36 | 14.67 | 13.68 | 13.93 | 7.47 | 12.39  | 13.78 | 14.25 | 15.76 | 5.70 |
|          | 27.0               | 13.38 | 14.63 | 13.65 | 10.63 | 5.36 | 11.44  | 13.51 | 14.40 | 15.69 | 5.70 |
|          | 28.5               | 10.22 | 14.67 | 15.22 | 15.32 | 5.32 | 11.80  | 13.66 | 14.64 | 15.47 | 5.44 |
|          | 30.4               | 10.20 | 14.65 | 13.68 | 17.60 | 8.83 | 12.08  | 13.72 | 14.03 | 15.91 | 6.24 |
| HDGBv3   | 23.1               | 11.43 | 14.58 | 15.21 | 16.92 | 7.52 | 11.72  | 13.36 | 13.68 | 15.52 | 5.48 |
|          | 25.4               | 10.90 | 14.66 | 13.68 | 13.95 | 7.46 | 12.09  | 14.72 | 13.93 | 16.12 | 5.68 |
|          | 27.0               | 13.36 | 14.64 | 15.27 | 15.33 | 5.33 | 11.58  | 13.36 | 14.20 | 15.73 | 5.92 |
|          | 28.5               | 10.88 | 14.64 | 13.72 | 15.33 | 5.30 | 11.16  | 13.75 | 13.67 | 15.90 | 5.85 |
|          | 30.4               | 13.36 | 14.65 | 15.25 | 17.60 | 7.46 | 11.86  | 13.06 | 13.97 | 15.45 | 6.70 |
| HDGBvdW  | 23.1               | 10.27 | 13.49 | 15.34 | 13.98 | 5.36 | 12.70  | 14.38 | 14.24 | 15.75 | 5.79 |
|          | 25.4               | 10.94 | 14.68 | 14.36 | 15.38 | 7.51 | 12.33  | 13.89 | 14.70 | 15.68 | 6.90 |
|          | 27.0               | 10.86 | 10.97 | 13.79 | 15.44 | 5.27 | 12.11  | 13.86 | 14.37 | 15.68 | 6.03 |
|          | 28.5               | 10.96 | 14.70 | 13.82 | 17.67 | 8.67 | 12.65  | 14.21 | 13.46 | 15.97 | 6.75 |
|          | 30.4               | 11.46 | 14.68 | 13.71 | 14.05 | 5.28 | 12.13  | 13.63 | 14.84 | 15.35 | 6.47 |

**Table S5.** Z-scores for each protein in decoy set 2 with different scoring functions with different membrane widths after application of the full scoring protocol.

| Model    | Membrane width [Å] | BRD7 | fmr5 | ltpA | RHOD | VATP |
|----------|--------------------|------|------|------|------|------|
| IMM1     | 23.1               | 7.40 | 5.53 | 3.91 | 5.39 | 5.52 |
|          | 25.4               | 7.15 | 5.79 | 3.73 | 5.36 | 5.84 |
|          | 27.0               | 7.17 | 5.19 | 3.90 | 5.23 | 5.57 |
|          | 28.5               | 7.44 | 5.54 | 3.95 | 4.92 | 5.52 |
|          | 30.4               | 6.87 | 5.16 | 3.73 | 4.59 | 5.08 |
| IMM1-p36 | 23.1               | 9.01 | 6.78 | 4.01 | 6.22 | 5.55 |
|          | 25.4               | 9.17 | 6.90 | 4.08 | 5.83 | 6.08 |
|          | 27.0               | 8.57 | 6.86 | 3.83 | 5.90 | 5.90 |
|          | 28.5               | 8.44 | 6.36 | 3.63 | 5.90 | 5.45 |
|          | 30.4               | 8.20 | 7.03 | 3.54 | 6.10 | 5.53 |
| GBSW     | 23.1               | 7.68 | 6.93 | 4.07 | 5.83 | 6.66 |
|          | 25.4               | 6.34 | 5.71 | 4.12 | 6.12 | 6.74 |
|          | 27.0               | 7.10 | 5.81 | 3.82 | 5.90 | 6.75 |
|          | 28.5               | 6.19 | 5.67 | 3.95 | 5.68 | 6.61 |
|          | 30.4               | 6.75 | 5.63 | 4.01 | 5.46 | 6.39 |
| HDGBv2   | 23.1               | 8.62 | 8.07 | 4.14 | 6.71 | 6.39 |
|          | 25.4               | 8.02 | 8.58 | 4.06 | 6.71 | 6.34 |
|          | 27.0               | 7.72 | 6.96 | 4.21 | 6.46 | 6.74 |
|          | 28.5               | 7.84 | 7.87 | 3.85 | 6.43 | 6.38 |
|          | 30.4               | 7.81 | 7.90 | 4.07 | 6.63 | 6.18 |
| HDGBv3   | 23.1               | 7.54 | 8.11 | 4.63 | 6.03 | 6.96 |
|          | 25.4               | 7.93 | 7.79 | 4.00 | 5.91 | 6.40 |
|          | 27.0               | 7.63 | 8.23 | 4.13 | 6.32 | 6.08 |
|          | 28.5               | 7.70 | 7.99 | 4.02 | 6.38 | 6.08 |
|          | 30.4               | 7.30 | 7.24 | 4.07 | 6.25 | 6.38 |
| HDGBvdW  | 23.1               | 9.10 | 7.02 | 4.29 | 5.95 | 6.25 |
|          | 25.4               | 7.96 | 6.80 | 4.00 | 6.24 | 6.31 |
|          | 27.0               | 7.74 | 7.03 | 4.37 | 6.28 | 6.11 |
|          | 28.5               | 6.80 | 6.79 | 3.96 | 5.91 | 5.54 |
|          | 30.4               | 7.18 | 7.03 | 4.08 | 5.88 | 5.60 |

**Table S6.** Spearman's rank correlation coefficients between scores and RMSD<sub>1</sub> and RMSD<sub>2</sub> for each protein in decoy set 2 with different scoring functions with different membrane widths after application of the full scoring protocol.

| Model    | Membrane width (Å) | RMSD <sub>1</sub> |       |      |      |      | RMSD <sub>2</sub> |       |      |      |      |
|----------|--------------------|-------------------|-------|------|------|------|-------------------|-------|------|------|------|
|          |                    | BRD7              | fmr5  | ltpA | RHOD | VATP | BRD7              | fmr5  | ltpA | RHOD | VATP |
| IMM1     | 23.1               | 0.65              | 0.08  | 0.72 | 0.67 | 0.38 | 0.65              | 0.10  | 0.71 | 0.65 | 0.11 |
|          | 25.4               | 0.65              | 0.09  | 0.75 | 0.67 | 0.41 | 0.65              | 0.11  | 0.75 | 0.66 | 0.20 |
|          | 27.0               | 0.71              | -0.02 | 0.77 | 0.72 | 0.40 | 0.70              | -0.01 | 0.77 | 0.72 | 0.34 |
|          | 28.5               | 0.73              | 0.01  | 0.78 | 0.70 | 0.44 | 0.72              | 0.03  | 0.79 | 0.70 | 0.41 |
|          | 30.4               | 0.70              | -0.08 | 0.79 | 0.70 | 0.45 | 0.71              | -0.07 | 0.77 | 0.70 | 0.46 |
| IMM1-p36 | 23.1               | 0.46              | 0.24  | 0.73 | 0.68 | 0.44 | 0.48              | 0.25  | 0.73 | 0.67 | 0.03 |
|          | 25.4               | 0.48              | 0.22  | 0.80 | 0.71 | 0.47 | 0.48              | 0.24  | 0.80 | 0.70 | 0.24 |
|          | 27.0               | 0.51              | 0.20  | 0.80 | 0.74 | 0.41 | 0.50              | 0.21  | 0.80 | 0.73 | 0.36 |
|          | 28.5               | 0.56              | 0.22  | 0.80 | 0.73 | 0.47 | 0.56              | 0.22  | 0.80 | 0.73 | 0.44 |
|          | 30.4               | 0.57              | 0.22  | 0.82 | 0.72 | 0.50 | 0.58              | 0.23  | 0.82 | 0.72 | 0.48 |
| GBSW     | 23.1               | 0.65              | 0.10  | 0.82 | 0.77 | 0.53 | 0.64              | 0.11  | 0.81 | 0.76 | 0.37 |
|          | 25.4               | 0.65              | 0.07  | 0.87 | 0.81 | 0.48 | 0.64              | 0.08  | 0.86 | 0.80 | 0.50 |
|          | 27.0               | 0.68              | 0.05  | 0.82 | 0.81 | 0.51 | 0.67              | 0.06  | 0.81 | 0.81 | 0.51 |
|          | 28.5               | 0.68              | 0.11  | 0.85 | 0.82 | 0.50 | 0.66              | 0.11  | 0.85 | 0.82 | 0.61 |
|          | 30.4               | 0.67              | 0.10  | 0.83 | 0.79 | 0.51 | 0.64              | 0.10  | 0.84 | 0.79 | 0.70 |
| HDGBv2   | 23.1               | 0.60              | 0.39  | 0.77 | 0.69 | 0.52 | 0.59              | 0.40  | 0.76 | 0.67 | 0.45 |
|          | 25.4               | 0.60              | 0.37  | 0.77 | 0.76 | 0.53 | 0.60              | 0.37  | 0.75 | 0.75 | 0.51 |
|          | 27.0               | 0.63              | 0.32  | 0.77 | 0.75 | 0.50 | 0.63              | 0.33  | 0.76 | 0.75 | 0.59 |
|          | 28.5               | 0.64              | 0.33  | 0.76 | 0.76 | 0.56 | 0.65              | 0.32  | 0.75 | 0.75 | 0.57 |
|          | 30.4               | 0.60              | 0.27  | 0.74 | 0.74 | 0.52 | 0.60              | 0.28  | 0.72 | 0.73 | 0.58 |
| HDGBv3   | 23.1               | 0.61              | 0.35  | 0.81 | 0.74 | 0.51 | 0.61              | 0.36  | 0.79 | 0.74 | 0.53 |
|          | 25.4               | 0.66              | 0.35  | 0.78 | 0.78 | 0.50 | 0.65              | 0.35  | 0.77 | 0.77 | 0.54 |
|          | 27.0               | 0.69              | 0.26  | 0.79 | 0.81 | 0.54 | 0.69              | 0.26  | 0.77 | 0.80 | 0.65 |
|          | 28.5               | 0.61              | 0.33  | 0.76 | 0.80 | 0.57 | 0.60              | 0.34  | 0.74 | 0.79 | 0.65 |
|          | 30.4               | 0.61              | 0.29  | 0.80 | 0.78 | 0.57 | 0.62              | 0.29  | 0.79 | 0.77 | 0.67 |
| HDGBvdW  | 23.1               | 0.62              | 0.32  | 0.81 | 0.78 | 0.46 | 0.62              | 0.32  | 0.80 | 0.77 | 0.56 |
|          | 25.4               | 0.58              | 0.24  | 0.78 | 0.80 | 0.51 | 0.58              | 0.24  | 0.76 | 0.79 | 0.66 |
|          | 27.0               | 0.66              | 0.33  | 0.75 | 0.82 | 0.41 | 0.66              | 0.33  | 0.75 | 0.82 | 0.65 |
|          | 28.5               | 0.58              | 0.34  | 0.76 | 0.79 | 0.53 | 0.59              | 0.34  | 0.75 | 0.78 | 0.72 |
|          | 30.4               | 0.59              | 0.33  | 0.78 | 0.76 | 0.53 | 0.59              | 0.32  | 0.77 | 0.75 | 0.73 |

**Table S7.** RMSD<sub>2</sub> values in [Å] for top-scoring models of each protein in decoy set 2 with different scoring functions with different membrane widths after application of the full scoring protocol.

| Model    | Membrane width [Å] | Top-1 |      |      |      |      | Top-10 |      |      |      |      |
|----------|--------------------|-------|------|------|------|------|--------|------|------|------|------|
|          |                    | BRD7  | fmr5 | ltpA | RHOD | VATP | BRD7   | fmr5 | ltpA | RHOD | VATP |
| IMM1     | 23.1               | 1.57  | 3.03 | 1.56 | 2.72 | 4.54 | 3.01   | 6.29 | 2.32 | 3.02 | 4.38 |
|          | 25.4               | 1.82  | 3.13 | 1.59 | 2.49 | 3.77 | 3.09   | 6.42 | 1.98 | 2.64 | 3.49 |
|          | 27.0               | 1.70  | 3.28 | 1.62 | 1.65 | 2.00 | 3.08   | 6.77 | 2.04 | 2.47 | 2.52 |
|          | 28.5               | 1.68  | 2.99 | 1.58 | 1.67 | 1.80 | 2.86   | 6.34 | 2.07 | 2.11 | 2.10 |
|          | 30.4               | 1.97  | 3.26 | 1.77 | 1.90 | 1.32 | 3.26   | 7.23 | 2.07 | 2.78 | 1.77 |
| IMM1-p36 | 23.1               | 2.37  | 3.05 | 1.57 | 3.15 | 4.51 | 4.16   | 5.51 | 2.70 | 3.71 | 4.41 |
|          | 25.4               | 3.00  | 2.16 | 1.39 | 2.80 | 3.80 | 3.81   | 4.69 | 2.07 | 2.90 | 3.60 |
|          | 27.0               | 1.73  | 1.79 | 1.45 | 1.76 | 2.11 | 4.56   | 4.87 | 2.62 | 2.74 | 2.63 |
|          | 28.5               | 1.74  | 3.02 | 1.51 | 1.69 | 1.87 | 3.39   | 5.19 | 2.56 | 2.26 | 1.86 |
|          | 30.4               | 2.09  | 3.27 | 1.80 | 1.90 | 1.31 | 3.83   | 5.67 | 2.21 | 2.47 | 1.84 |
| GBSW     | 23.1               | 1.59  | 1.60 | 1.77 | 1.94 | 1.85 | 2.90   | 6.12 | 2.10 | 2.31 | 1.87 |
|          | 25.4               | 1.68  | 6.20 | 1.72 | 1.68 | 1.88 | 3.00   | 6.30 | 2.05 | 2.47 | 1.93 |
|          | 27.0               | 2.86  | 1.59 | 1.48 | 1.62 | 1.80 | 2.67   | 5.80 | 2.04 | 2.57 | 1.78 |
|          | 28.5               | 1.59  | 1.60 | 1.50 | 1.70 | 1.81 | 2.41   | 6.44 | 2.12 | 2.23 | 1.78 |
|          | 30.4               | 1.63  | 1.58 | 1.52 | 1.58 | 1.74 | 3.10   | 6.55 | 2.02 | 2.40 | 1.95 |
| HDGBv2   | 23.1               | 1.73  | 1.61 | 1.57 | 1.67 | 1.89 | 3.69   | 6.17 | 2.15 | 2.58 | 1.89 |
|          | 25.4               | 1.73  | 3.01 | 1.50 | 1.61 | 1.78 | 3.49   | 5.58 | 2.51 | 2.54 | 1.78 |
|          | 27.0               | 1.74  | 1.60 | 1.57 | 1.62 | 1.80 | 3.20   | 5.42 | 2.15 | 2.11 | 1.82 |
|          | 28.5               | 1.73  | 1.56 | 1.76 | 1.96 | 1.79 | 2.96   | 5.04 | 2.09 | 2.46 | 1.84 |
|          | 30.4               | 1.74  | 4.06 | 1.54 | 1.61 | 1.76 | 3.56   | 5.77 | 2.55 | 2.48 | 1.90 |
| HDGBv3   | 23.1               | 1.66  | 1.66 | 1.49 | 1.94 | 1.82 | 2.79   | 5.59 | 2.52 | 2.49 | 1.81 |
|          | 25.4               | 1.57  | 1.61 | 1.57 | 1.95 | 1.77 | 3.27   | 4.96 | 2.52 | 2.58 | 1.96 |
|          | 27.0               | 1.65  | 1.62 | 1.87 | 1.58 | 1.79 | 3.62   | 5.30 | 2.16 | 2.09 | 1.78 |
|          | 28.5               | 1.59  | 6.24 | 1.75 | 1.60 | 1.84 | 3.07   | 5.04 | 2.17 | 2.09 | 1.80 |
|          | 30.4               | 1.64  | 1.58 | 1.58 | 1.59 | 1.77 | 3.51   | 4.97 | 2.52 | 2.21 | 1.84 |
| HDGBvdW  | 23.1               | 1.64  | 1.64 | 1.63 | 1.59 | 1.95 | 3.72   | 4.24 | 2.21 | 2.67 | 2.07 |
|          | 25.4               | 1.68  | 1.63 | 1.59 | 1.99 | 1.87 | 3.61   | 5.42 | 2.10 | 2.39 | 2.00 |
|          | 27.0               | 1.67  | 1.64 | 1.62 | 1.61 | 1.87 | 3.37   | 4.73 | 2.68 | 2.58 | 2.05 |
|          | 28.5               | 1.68  | 1.61 | 1.59 | 1.64 | 1.90 | 3.96   | 4.24 | 2.39 | 2.12 | 1.95 |
|          | 30.4               | 2.01  | 3.37 | 1.55 | 1.65 | 1.80 | 4.11   | 3.75 | 2.56 | 2.40 | 1.98 |



**Table S8.** Average z-scores and Spearman’s rank correlation coefficients with different membrane widths for different energy components as in Table S4 but for decoy set 2.

| Model   | Membrane width [Å] | Z-scores |      |      |       |       | Correlation coefficients |      |      |       |       |
|---------|--------------------|----------|------|------|-------|-------|--------------------------|------|------|-------|-------|
|         |                    | TOT      | VDW  | ELEC | ASP   | GB    | TOT                      | VDW  | ELEC | ASP   | GB    |
| IMM1    | 23.1               | 5.55     | 5.00 | 3.48 | -4.15 | -     | 0.50                     | 0.36 | 0.30 | -0.15 |       |
|         | 25.4               | 5.57     | 4.95 | 3.55 | -3.83 | -     | 0.52                     | 0.38 | 0.32 | -0.13 |       |
|         | 27.0               | 5.41     | 5.10 | 3.61 | -3.86 | -     | 0.52                     | 0.37 | 0.34 | -0.13 |       |
|         | 28.5               | 5.48     | 4.84 | 3.71 | -3.75 | -     | 0.53                     | 0.35 | 0.36 | -0.13 |       |
|         | 30.4               | 5.09     | 4.69 | 3.48 | -3.50 | -     | 0.51                     | 0.38 | 0.39 | -0.17 |       |
| MM1-p36 | 23.1               | 6.32     | 4.95 | 4.42 | -4.90 | -     | 0.51                     | 0.32 | 0.32 | -0.13 |       |
|         | 25.4               | 6.41     | 4.97 | 4.55 | -4.65 | -     | 0.54                     | 0.31 | 0.32 | -0.09 |       |
|         | 27.0               | 6.21     | 4.96 | 4.22 | -4.38 | -     | 0.53                     | 0.32 | 0.35 | -0.11 |       |
|         | 28.5               | 5.96     | 4.82 | 4.18 | -4.23 | -     | 0.56                     | 0.33 | 0.37 | -0.11 |       |
|         | 30.4               | 6.08     | 5.22 | 4.14 | -4.38 | -     | 0.57                     | 0.28 | 0.44 | -0.12 |       |
| GBSW    | 23.1               | 6.23     | 4.51 | 2.82 | 4.65  | -2.46 | 0.57                     | 0.34 | 0.41 | 0.25  | -0.35 |
|         | 25.4               | 5.80     | 4.42 | 2.62 | 4.27  | -2.23 | 0.57                     | 0.34 | 0.41 | 0.28  | -0.34 |
|         | 27.0               | 5.88     | 4.58 | 2.73 | 4.19  | -2.27 | 0.57                     | 0.33 | 0.34 | 0.26  | -0.25 |
|         | 28.5               | 5.62     | 4.46 | 2.49 | 3.86  | -1.93 | 0.59                     | 0.37 | 0.34 | 0.25  | -0.22 |
|         | 30.4               | 5.65     | 4.46 | 2.85 | 3.69  | -2.34 | 0.58                     | 0.38 | 0.37 | 0.27  | -0.25 |
| HDGBv2  | 23.1               | 6.79     | 4.98 | 2.35 | 2.70  | -1.74 | 0.59                     | 0.37 | 0.34 | 0.28  | -0.26 |
|         | 25.4               | 6.74     | 4.94 | 2.11 | 2.68  | -1.54 | 0.61                     | 0.35 | 0.37 | 0.27  | -0.28 |
|         | 27.0               | 6.42     | 4.94 | 2.26 | 2.74  | -1.64 | 0.60                     | 0.35 | 0.37 | 0.26  | -0.27 |
|         | 28.5               | 6.47     | 4.91 | 2.29 | 2.83  | -1.70 | 0.61                     | 0.37 | 0.36 | 0.30  | -0.27 |
|         | 30.4               | 6.52     | 5.24 | 2.04 | 2.55  | -1.43 | 0.57                     | 0.37 | 0.33 | 0.30  | -0.24 |
| HDGBv3  | 23.1               | 6.65     | 4.93 | 2.29 | 2.47  | -1.63 | 0.60                     | 0.38 | 0.34 | 0.26  | -0.25 |
|         | 25.4               | 6.41     | 4.70 | 2.40 | 2.76  | -1.72 | 0.61                     | 0.38 | 0.36 | 0.26  | -0.24 |
|         | 27.0               | 6.48     | 5.07 | 2.19 | 2.64  | -1.48 | 0.62                     | 0.38 | 0.33 | 0.29  | -0.22 |
|         | 28.5               | 6.44     | 5.07 | 2.30 | 2.77  | -1.62 | 0.61                     | 0.36 | 0.33 | 0.26  | -0.21 |
|         | 30.4               | 6.25     | 4.69 | 2.09 | 2.42  | -1.36 | 0.61                     | 0.40 | 0.39 | 0.31  | -0.28 |
| HDGBvdW | 23.1               | 6.52     | 5.61 | 2.67 | -5.76 | -1.95 | 0.60                     | 0.37 | 0.36 | -0.32 | -0.27 |
|         | 25.4               | 6.26     | 5.78 | 2.23 | -5.73 | -1.57 | 0.58                     | 0.38 | 0.37 | -0.31 | -0.26 |
|         | 27.0               | 6.30     | 5.40 | 2.70 | -5.65 | -1.94 | 0.59                     | 0.40 | 0.34 | -0.35 | -0.23 |
|         | 28.5               | 5.80     | 5.53 | 2.20 | -5.51 | -1.54 | 0.60                     | 0.39 | 0.33 | -0.33 | -0.22 |
|         | 30.4               | 5.96     | 5.50 | 2.34 | -5.36 | -1.59 | 0.60                     | 0.37 | 0.34 | -0.34 | -0.23 |
